# Aerosol transmission of COVID-19 and infection risk in indoor environments

J. Lelieveld<sup>1,2</sup>, F. Helleis<sup>1</sup>, S. Borrmann<sup>1</sup>, Y. Cheng<sup>1</sup>, F. Drewnick<sup>1</sup>, G. Haug<sup>1</sup>, T. Klimach<sup>1</sup>, J. Sciare<sup>2</sup>, H. Su<sup>1</sup>, U. Pöschl<sup>1</sup>

<sup>1</sup> Max Planck Institute for Chemistry, Hahn-Meitner-Weg 1, 55128, Mainz, Germany

<sup>2</sup> The Cyprus Institute, Climate and Atmosphere Research Center, 20 Konstantinou Kafafi Street, 2121 Aglantzia, Nicosia, Cyprus

Email: [jos.lelieveld@mpic.de](mailto:jos.lelieveld@mpic.de)

## Abstract

The role of aerosolized SARS-CoV-2 viruses in airborne transmission of COVID-19 is debated. The transmitting aerosol particles are generated through the breathing and vocalization by infectious subjects. Some authors state that this represents the dominant route of spreading, while others dismiss the option. Public health organizations generally categorize it as a secondary transmission pathway. Here we present a simple, easy-to-use spreadsheet algorithm to estimate the infection risk for different indoor environments, constrained by published data on human aerosol emissions, SARS-CoV-2 viral loads, infective dose and other parameters. We evaluate typical indoor settings such as an office, a classroom, a choir practice room and reception/party environments. These are examples, and the reader is invited to use the algorithm for alternative situations and assumptions. Our results suggest that aerosols from highly infective subjects can effectively transmit COVID-19 in indoor environments. This “*highly infective*” category represents about one fifth of the patients tested positive for SARS-CoV-2. We find that “*super infective*” subjects, representing the top few percent of positive-tested ones, plus an unknown fraction of less, but still highly infective, high aerosol-emitting subjects, may cause COVID-19 clusters (>10 infections), e.g. in classrooms, during choir singing and at receptions. The highly infective ones also risk causing such events at parties, for example. In general, active room ventilation and the ubiquitous wearing of face masks (i.e. by all subjects) may reduce the individual infection risk by a factor of five to ten, similar to high-volume HEPA air filtering. The most effective mitigation measure studied is the use of high-quality masks, which can drastically reduce the indoor infection risk through aerosols.

Keywords: COVID-19, infection risk, SARS-CoV-2 virus, airborne transmission, aerosols, indoor environment

**NOTE: This preprint reports new research that has not been certified by peer review and should not be used to guide clinical practice.**

## 1. Introduction

There is growing evidence that the spreading of coronavirus SARS-CoV-2 through aerosols, i.e. small airborne particles and microdroplets in the size range up to 5  $\mu\text{m}$  diameter, is a significant transmission pathway of COVID-19 (Cai et al., 2020). Case studies worldwide indicate that SARS-CoV-2 has viable survival rates in the air, and remains airborne for an extended period of several hours (Jayaweera et al., 2020). The European Centre for Disease Prevention and Control (ECDC) states that COVID-19 is mainly transmitted via SARS-CoV-2 virus-containing respiratory droplets (i.e. larger than 5  $\mu\text{m}$  in diameter), while aerosols are implicated in transmission, but the relative roles of droplets and aerosols remains unclear (<https://www.ecdc.europa.eu/en/covid-19/latest-evidence/transmission>). Further, the ECDC underscores the high viral load in patients close to symptom onset, suggesting that COVID-19 patients are relatively contagious at an early stage of infection. Findings for both SARS-CoV-1 and SARS-CoV-2 point to superspreading of aerosols as an important factor in the indoor disease transmission (Lloyd-Smith et al., 2005). This is consistent with the nearly 20 times higher likelihood of indoor compared to outdoor disease spreading (Nishiura et al., 2020). Many studies on the spread of viruses, including respiratory syncytial virus (RSV), Middle East Respiratory Syndrome coronavirus (MERS-CoV), and influenza, corroborate that viable viruses in aerosols are emitted by infected subjects, and have been detected in their environment, from which Morawska and Milton (2020) conclude that people inhale the aerosolized viruses, resulting in infection and disease.

Zhang et al. (2020) pose that airborne transmission is highly virulent and represents the dominant route in the spreading of COVID-19. They find that the wearing of face masks has been a critical aspect in the outcome of COVID-19 trends in three main areas affected by the pandemic (Wuhan, Italy, New York). Other measures, such as social distancing, appeared to have been insufficient, suggesting an important role of aerosols as they disperse over relatively large distances. Schools represent an environment of special interest, with compulsory attendance, and their closure can be societally disruptive. Nevertheless, schools have been closed, which has helped reduce the disease incidence and mortality, especially in the early stages of COVID-19 outbreaks (Auger et al., 2020). SARS-CoV-2 viral loads in infected children appear to be similar to those in adults (Wölfel et al., 2020; Jones et al., 2020). On the other hand, the incidence of COVID-19 under children may be less than among adults (Jacot et al., 2020; Davies et al., 2020; Mizumoto et al., 2020). Transmission of SARS-CoV-2 between children in schools was predicted to be less efficient than of influenza, and Viner et al. (2020) conclude that school closures may prevent only a small percentage (<5%) of COVID-19 deaths. Furthermore, Klompas et al. (2020) argue that by demonstrating aerosol generation by speaking and coughing, or by recovering viral RNA from the air, the aerosol-based transmission is not proven – infection also depends on the route and duration of exposure, the

infection dose and host defenses. These authors argue that infection rates and transmission in populations during normal daily life are difficult to reconcile with aerosol-based transmission.

Apparently, the role of aerosols in the spreading of SARS-CoV-2 is controversial. Here we present a simple, but transparent and easily adjustable spreadsheet algorithm to estimate the indoor infection risk from aerosolized viruses, based on adjustable parameters such as room size, number of exposed subjects, inhalation volume, and aerosol production from breathing and vocalization. We apply it to study the role of aerosol transmission of SARS-CoV-2 in indoor locations, based on assumptions about the viral load and infection dose, for example, constrained by data from the literature. We focus on aerosol transmission, hence implicitly assuming that contact infection and by larger droplets are either minimal, e.g. through social distancing and hygienic measures, or that these transmission routes should be considered additionally. Our approach aims to provide insight into the effectiveness of mitigation measures against indoor COVID-19 infection through aerosols.

## 2. Methods

To estimate the COVID-19 infection risk from airborne transmission, we developed a spreadsheet algorithm that includes a number of modifiable environmental factors that represent relevant physiological parameters and environmental conditions. The spreadsheet can be found in the Supplement, and the parameters are listed in Table 1. The standard setting represents a case for a 60 m<sup>2</sup> large and 3 m high room with 24 susceptible subjects (i.e. at total of 25 subjects), representing a classroom where one pupil is infectious for two days, being present during six hours per day. For simplicity, all subjects are assumed to be equal in terms of breathing, speaking and susceptibility to infection. The two-day period represents that of highest infectiousness of the index subject, after which s/he is assumed to either develop symptoms and stay at home or become substantially less infectious. The spreadsheet parameters can be easily adjusted to account for different environmental conditions and activities. In addition to the classroom setting, we consider three common types of environment, as indicated in Table 2. To study the impact of measures that can mitigate infection risks, we consider five scenarios (Table 3). In the next section we review the recent literature to underpin the parameter settings and ranges. We emphasize that continued progress in scientific understanding of COVID-19 may require future adjustments of assumptions and parameter settings.

In the standard case for a room with closed windows, we assume a passive indoor air volume exchange rate of 0.35 hr<sup>-1</sup> (Howard-Reed et al., 2011). If active blow ventilation with outside air is applied for short periods every hour, the rate increases to 2 hr<sup>-1</sup>, while the application of one or more high-volume air filtering devices (with High-Efficiency Particulate – HEPA filters) reduce the aerosol concentration according to an equivalent exchange rate of 9 hr<sup>-1</sup>. Obviously, the exchange rates can vary depending on the capacity of the devices. We emphasize that the conditions presented here

exemplify a few prominent cases, and the effectiveness of the mitigation measures are mere illustrations. By modifying the parameter settings in the spreadsheet, a range of conditions, settings and mitigation measures can be simulated. For example, a respiration rate of 10L/min (Table 1) is representative for a person between being at rest and performing light activity, whereas calculations for exercising subjects in a fitness center would have to scale this up by a factor of three to five. Further, children respire a smaller volume of air than adults but at higher frequency. Finally, we assume rapid mixing of the air in the rooms (within minutes), which seems reasonable considering the turbulent atmosphere with localized human heat sources and movement, but it imposes the restriction of room sizes up to about 100 m<sup>2</sup>. Although our spreadsheet algorithm is simple, it represents the available scientific knowledge of aerosol transmission, and transparently shows how different conditions, parameters and precautionary measures can influence SARS-CoV-2 infection.

### 3. Parameter constraints

#### 3.1. Particle size

Humans produce infectious aerosols in a wide range of particle sizes, but viruses and other pathogens are predominately found in the small particles, which are immediately respirable by individuals who are exposed (Cheng et al., 2020). Speech and coughing generate distinct aerosol and droplet size modes at median diameters of around 1 µm and 2 µm, and also relatively large ones of >100 µm. The modes are associated with three processes: one occurring deeply in the lower respiratory tract, another in the region of the larynx and a third in the upper respiratory tract including the oral cavity. The first contains the respiratory droplets produced during normal breathing. The second, the laryngeal mode, is most active during vocalization and coughing. The third, the oral cavity mode, is active during speech and coughing (Johnson et al., 2011). Research on seasonal influenza transmission showed that sneezing and coughing are relatively unimportant infection pathways, and are not needed to explain virus aerosolization because of their relatively low frequency of occurrence (Yan et al., 2020). Therefore, we disregard coughing and sneezing as sources of infectious particles, also because symptomatic subjects should not appear in public buildings.

Typically, 80 to 90% of particles from breathing and speaking have a diameter around 1 µm, defined as aerosol particles, i.e. shortly after their emission as respiratory droplets, which dry in the environment. Upon emission from the human respiratory system at a relative humidity (RH) close to 100%, the particles are initially wet and relatively large, but in ambient air, at reduced RH, they rapidly dehydrate and transform into more-or-less dry aerosols. Aerosol particles of about 1 µm diameter evaporate in milliseconds, small droplets of 10 µm in less than a second, while relatively large droplets, with diameters >100 µm, can survive for almost a minute and fall to the ground before they evaporate (Asadi et al., 2019; Borak, 2020; Vuorinen et al., 2020). The number, size and volume

of the droplets emitted according to the level of vocalization, plus the viral SARS-CoV-2 load determine the flux of viruses into the environment. The viral load in the aerosols may be equal or even higher than in the larger droplets (Cheng et al., 2020). Based on observed number and volume size distributions of respiratory droplets emitted during breathing and speaking (Johnson et al., 2011) and the size dependence of viral load (Cheng et al., 2020), we assume that the emitted droplets initially have an effective average diameter of 5  $\mu\text{m}$ , quickly shrinking to aerosol particles to around 1  $\mu\text{m}$  in ambient air.

### 3.2. Particle emissions and vocalization

The concentrations of particles (microdroplets) produced from human speech can range from 0.1–3  $\text{cm}^{-3}$  depending on loudness (Asadi et al., 2019). Morawska et al. (2009) report a particle production of about 0.1–1.1  $\text{cm}^{-3}$  for the range between breathing and sustained vocalization. Singing is a particularly strong aerosol source, and can emit two orders of magnitude more aerosol particles than breathing. At the quietest volume, neither singing nor speaking are significantly different from breathing (Gregson et al., 2020). Note that the unit  $\text{cm}^{-3}$  is related to the volume respiration rate to obtain the emission flux. Some individuals are super emitters, producing aerosol particles at an order of magnitude higher rate than others, although the mechanism is unknown (Asadi et al., 2020). Aerosol super emitters are not very common, and could be symptomatic or not. If such an infected person is engaged in loud speaking or singing, the formation of droplets and aerosols, and thus viral emissions, can increase by one to two orders of magnitude (Asadi et al., 2019; Morawska et al., 2009; Mürbe et al., 2020), which may explain the occasional superspreading events in crowded situations (Riediker and Tsai, 2020). Considering the reported ranges of particle size distributions and emission rates, and an effective mean diameter of  $\sim 5 \mu\text{m}$  as outlined above, we adopt characteristic particle number concentrations of 0.06  $\text{cm}^{-3}$  for breathing, 0.6  $\text{cm}^{-3}$  for speaking, and 6  $\text{cm}^{-3}$  for singing (Asadi et al., 2019, 2020; Morawska et al., 2009; Mürbe et al., 2020; Johnson et al., 2011; Cheng et al. 2020).

### 3.3. Viral load

The viral load in emissions from symptomatic and asymptomatic cases has not yet been directly determined, and information on the number of SARS-CoV-2 copies in the air is scarce. The working hypothesis is that the respiratory aerosols/droplets emitted by infected persons have the same viral load as found in the body fluids that generate these aerosols/droplets (Fernandes et al. 2019; Cheng et al., 2020). The median incubation period of COVID-19 is about 5 days (Lauer et al., 2020). It is particularly relevant to focus on pre-symptomatic and asymptomatic transmission, as individuals with symptoms are expected to stay at home. Both have been observed, and transmission can occur 1-3 days before the development of symptoms, which may cause about half of the infections (Arons et al., 2020; ECDC). From a literature review, Buitrago-Garcia (2020) concluded that the average fraction of SARS-CoV-2 infections that remain asymptomatic is about 20% (95% confidence interval is 17–

25%). These significant fractions of infections from pre- and asymptomatic index cases provide extra motivation for mitigation measures.

The typical range of RNA copies found in the throat and sputum of COVID-19 patients is  $10^4$ – $10^{11}$  mL<sup>-1</sup> (Pan et al., 2020; Pujadas et al., 2020; To et al., 2020; Wölfel et al., 2020). The viral load was found to increase with advanced age (To et al., 2020), and with the severity of COVID-19 outcomes (Yu et al., 2020). Swiss and German teams together collected around 80,000 specimens, of which roughly ten percent were positive in RT-PCR tests (Jacot et al., 2020; Jones et al., 2020). It was found that the viral loads do not differ between age categories, but young subjects (especially under 10 years) tested positive less frequently. This may be due to less frequent diagnoses among children, associated with the absence of symptoms or only mild symptoms (Jones et al., 2020).

Infectiousness was found to be highest around the onset of symptoms (He et al., 2020; Jacot et al., 2020; Jones et al., 2020; To et al., 2020). Here we focus on the phase when subjects are most infectious, and find that this represents a fraction of about one fifth of the positive-tested patients, during which they have a mean viral load of about  $5 \times 10^8$  mL<sup>-1</sup>. We use this estimate to define the category “*highly infectious*”. A few percent of positive-tested subjects had a very high mean viral load of about  $5 \times 10^9$  mL<sup>-1</sup>, which is adopted to define the category “*super infectious*”. We note that these values may need to be adjusted subject to ongoing studies. The corresponding input parameters can be easily replaced in the spreadsheet algorithm, but such changes are not expected to alter the conclusions about the effectiveness of the investigated precautionary measures (e.g. ventilation and face masks).

### 3.4. Virus lifetime in aerosol

Reports of so-called super spreader events corroborate that aerosols can play a role in SARS-CoV-2 transmission, because many infected persons were well away (>1.5 m) from the index subject. For example, during a 2.5-hour choir practice of 61 persons, a single person infected more than half of the group (Hamner et al., 2020). The emission was amplified by the singing. In indoor air, SARS-CoV-2 is able to remain viable for at least three hours post-aerosolization, similarly to SARS-CoV-1 (van Doremalen et al., 2020). The half-life of the SARS-CoV-2 virus on aerosols is about 1.1–1.2 hours within a 95% confidence interval of 0.64–2.64 hours. For MERS-CoV a similar airborne survival period was found, which declined in hot and dry air conditions (Pyankov et al., 2017). From studies of “surrogate” RNA viruses, assuming analogous behavior of SARS-CoV-2, it seems that virus survival in the air increases with decreasing temperature and relative humidity (Casanova et al., 2010). This could be an issue in regions with cold and dry winter conditions, as ventilating with outside air will decrease both the temperature and relative humidity in the room, thus reducing the virus concentrations but increasing their lifetime. Humidity can also affect the size and lifetime of the aerosol particles (Wang et al., 2020). Here we neglect these hitherto unquantified influences of

temperature and humidity, and adopt the half-life measured by van Doremalen et al. (2020), resulting in a lifetime (e-folding time) of 1.7 hours.

### 3.5. Particle deposition probability

If a safe distance of about 1.5 m is met, most of the large droplets emitted by infected subjects will settle gravitationally and tend to not reach recipients (except for coughing and sneezing) (Liu et al., 2017). However, aerosolized viruses remain airborne, and their inhalation leads to effective uptake in the nasal fossa, pharynx and larynx, trachea and lungs (de Gabory et al., 2020). After being inhaled, particles of  $>20$   $\mu\text{m}$  diameter are predominantly deposited in the upper respiratory tract, while more than 90% of the fine aerosol particles with a diameter smaller than 2.5  $\mu\text{m}$  can penetrate deeply into the lungs (Inthavong et al., 2012; de Gabory et al., 2020). By simulating inhalation and associated turbulent air motions in the respiratory system, it was estimated that 100  $\mu\text{m}$  particles deposit in the nasal fossa, while 15  $\mu\text{m}$  particles have a 62% probability to reach the lungs; and for 1  $\mu\text{m}$  particles this was estimated at 94% (Inthavong et al., 2017; Dong et al., 2019; de Gabory et al., 2020). Since most viruses are contained in the small particles, it may be assumed that they penetrate deeply and, when retained, have the potential to cause infection in the lungs.

Measurements and model simulations of particle deposition within the respiratory system indicate that for 1  $\mu\text{m}$  particles the deposited fraction is relatively low, about 0.2 (Stahlhofen et al., 1989; Asgharian et al., 2010). However, this applies to hydrophobic particles studied in laboratory settings. Since the SARS-CoV-2 containing particles are hydrophilic and the relative humidity in the respiratory tract is close to 100%, it is important to account for the aerosol hygroscopic growth, which increases the inertia and sedimentation of the particles, hence a deposition probability of 0.5 was found to be more realistic (Heyder, 2004; Tsuda et al., 2013). This was corroborated by measurements of ambient particle deposition in human subjects (Montoya et al., 2004). It should be mentioned that cells in the conducting zone may be particularly vulnerable to SARS-CoV-2 attack (increased expression of ACE2 receptors), hence in this respect the larger aerosol particles and droplets, which penetrate less deeply, could be particularly significant (Hsiao et al., 2020; Lukassen et al., 2020).

### 3.6. Face mask efficiency

Many studies have reported that facial masks substantially reduce the infection risk, which applies to disposable surgical masks as well as reusable cloth masks (Chu et al., 2020; Esposito et al., 2020; Fischer et al., 2020; Howard et al., 2020; Leung et al., 2020; MacIntyre and Chughtai, 2020). Mueller et al. (2020) found that, when worn as designed, surgical and cloth masks have filtration efficiencies of 53–75% and 28–90%, respectively. Mask wearing works in two ways, by preventing infected subjects from spreading droplets and aerosols, and by limiting exposure through inhalation. Verma et al. (2020) report that homemade masks with multiple fabric layers effectively reduce droplet dispersal. Drewnick et al. (2020) investigated many materials, and measured a large range of filtration

efficiencies, from about 10% to 100%. Materials with small leak areas, e.g. 1–2%, were shown to have substantially reduced efficiency. By the stacking of a number of fabric layers, homemade masks appeared to achieve good filtration efficiencies of about 50–80% for 0.5–10  $\mu\text{m}$  particles, and 30–60% for 30–250 nm particles. These results agree with Shakya et al. (2017), and confirm that surgical masks are generally more efficient than homemade cloth products (Davies et al., 2013).

The filtering efficiency of medical and non-medical masks is typically exceeded by N95 (filter 95% of the particles), FFP2 (filter  $\geq 94\%$ ) and FFP3 ( $\geq 99\%$ ) respirators, which are recommended for health-care workers (Chu et al., 2020; Howard et al., 2020). The universal, public wearing of masks (not respirators) by at least 80% of the population was shown to be particularly effective in reducing the spreading of COVID-19 (De Kai et al., 2020). The effectiveness of using face masks by the general population obviously increases with their filter efficiency, but even if it is low, the benefits are apparent (Worby and Chang, 2020). By studying policies in different countries, De Kai et al. (2020) found a strong correlation between mask wearing and both daily and peak growth reduction of COVID-19, with successful application in countries such as China, South Korea and Japan, where this practice is ubiquitous.

For our purpose we assume an inhalation filtering efficiency of about 30%, and a reduction in droplet and aerosol emissions of about 60%. This yields a total risk reduction of about 70% when all subjects in the room are compliant, in accord with the significant face mask efficacy derived by Cheng et al. (2020). Different values can be easily tested with our algorithm, and we also consider a scenario with 95% efficiency, i.e. of a high-quality mask (Table 3). Note that the ubiquitous wearing of respirators (e.g. N95 or FFP2), which very efficiently limit the inhalation and exhalation of particles, would decrease the infection risk even more strongly by more than 99%.

### 3.7. Infective dose $D_{50}$

The number of viral copies that are needed to cause an infection can vary depending on host defenses, for example. It is expressed as  $D_{50}$ , being the mean dose that causes an infection in 50% of susceptible subjects. The  $D_{50}$  is not well known for COVID-19, and we have to rely on indirect information, notably because human volunteers would be needed to obtain this information. Watanabe et al. (2010) developed a dose-response model for SARS-CoV-1 based on animal studies, and found a  $D_{50}$  of 280 viral copies (and a  $D_{10}$  of 43 copies), which is similar to that for the common cold and animal coronaviruses. Schröder (2020) mentions that the  $D_{50}$  found for Influenza A is 790 viral copies, but that its infectiousness is much lower than of SARS-CoV-2. Watanabe et al. (2010) applied their model to a SARS-CoV-1 outbreak in Hong Kong, and back-calculated a  $D_{50}$  between 16 and 160 viruses per person. From a review of data and comparisons with SARS-CoV-1 and MERS, Karimzadeh et al. (2020) concluded that the  $D_{50}$  for SARS-CoV-2 in humans is less than 1000 viral copies, but slightly higher than estimated for SARS-CoV-1.



Here we assume that D50 is in the range of 100–1,000, and by taking the geometric mean, we arrive at D50=316 viral copies. This corresponds to a virus titer of about 220 plaque forming units (PFU $\approx$ 0.7·D50, with PFU being a measure of concentration in virology) (Karimzadeh et al., 2020). This means that the infection risk of a single viral RNA copy is:

$$P_{RNA}(\%) = 1 - 10^{\frac{\log_{10}(0.5)}{D50}} \cdot 100 = 0.22\%.$$

The infection risk of a individual person in the room follows from

$$R_i(\%) = [1 - (1 - P_{RNA})^{D_{episode}}] \cdot 100,$$

in which  $D_{episode}$  represents the number of viral copies inhaled and deposited in the airways. The risk of one of the persons in the room being infected is

$$R(\%) = [1 - (1 - P_{RNA})^{(D_{episode} \cdot n)}] \cdot 100,$$

where  $n$  is the number of susceptible subjects in the room. Note that the number of inhaled viral copies follows a Poisson distribution, but because viruses are considered to have independent and identical infectivity, the calculated infection probability is the same regardless of whether a Poisson distribution is considered or not.

## 4. Results

In our assessment of indoor infection risks and the effectiveness of mitigation measures, we consider a single infected person (index case) present within the group in each of the four investigated example environments. This person is likely to be pre-symptomatic (typically 1–3 days), as the highest viral load mostly occurs around the onset of symptoms, after which the patient is expected to stay at home. Alternatively, the index subject can be asymptomatic, which happens in about 20% of cases, although it is not clear whether such individuals are equally infectious. Figure 1, and Tables 4 and 5 present the risk assessment for standard conditions (highly infectious index case) and super spreader events, respectively. For the latter we assume that either the viral load is a factor of ten higher than for the highly infectious index subject (thus being super infectious) or the person is a super aerosol-emitter. It is theoretically possible that both occur in the same person, but the incidence of such cases is probably very low, so that we disregard this option.

### 4.1. Office environment

Here we assume the presence of four subjects, one being highly infectious for two days (eight hours/day). Under scenario A (only passive ventilation), the risk that one of the others becomes infected is 45%, and the individual infection risk is 18%. Active ventilation with outside air (B) reduces these risks by a factor of 2 to 2.5, and by additionally wearing face masks (C) the risks are

reduced by a factor of 7 to 8 (Table 4). A similar risk reduction (factor of 8 to 9) is achieved by applying high-volume HEPA filtering (E). The wearing of high-quality masks (D) leads to the largest risk reduction by more than a factor of 40. In the case of a super spreader event, two to three colleagues would likely be infected, which could be reduced to one to two by active ventilation (B). An overall reduction of the individual risk by a factor of 4 to 5 could be achieved by additionally wearing masks or by high-volume HEPA ventilation (C, E). The individual risk could be reduced by a factor of 25 by wearing high-quality masks (D). Although these conditions refer to an office environment, the risk reduction achieved by active ventilation and wearing masks also applies to other environments with similar dimensions and numbers of subjects, for example a hospital ward or a room in a nursing home.

#### *4.2. Classroom environment*

We putatively distinguish the young (children under 10 years) from the older pupils, because especially the young ones may potentially be less infective (or less often infective), for which we assume a reduced viral load by a factor of ten. Our results in Table 4 show that the risk of COVID-19 from a reduced-infective subject in this youngest group is about 21% (scenario A), while the individual risk is about 1%. For the older pupils with a highly infective index subject this is 91% and nearly 10%, respectively. Ventilating with outside air is helpful, as it reduces the individual aerosol infection risk for the ones under ten to a very low fraction, i.e. well under a percent, assuming that these children are present during two days (six hours/day), and perhaps even less as the time in the classroom could be shorter than six hours. For the older children, active ventilation with outside air will reduce the risk of one becoming infected to about 58% (B). A low individual risk of about 1% may be achieved for these children by additionally wearing face masks (C).

In a classroom-type environment with sensitive subjects (with enhanced risk of severe COVID-19 progression), high-volume HEPA filtration could be considered to reduce the individual infection risk by a factor of 9 to 10, or more when combined with other mitigation measures. This would work for all classrooms, of course, but expensive filtration techniques should probably be reserved for those who need it most. In the case of a super spreader among the pupils or teacher, the risk is high, and 63% of the others could be infected. Even with active ventilation and mask wearing it seems unavoidable that a few will be infected, but these measures can nevertheless decrease the individual infection risk substantially, i.e. by a factor of 6 to 7 (Table 5). High-quality masks (or even better respirators) could keep the infection risk in check, but it may not be realistic to expect this in schools (as it is for nursing staff). Note that we do not distinguish between pupils and the teacher, who is likely to do much of the talking, associated with significant particle emissions, which could be accounted for by refining the settings in the spreadsheet.

#### *4.3. Choir practice*

The infection risk for choir members is clearly enhanced, in spite of the twofold larger room volume compared to the classroom with the same number of subjects present (Table 4, Figure 1). This

is due to the much higher rate of aerosol emission during singing compared to breathing, for which we assume a breathing/vocalization ratio of 0.25 and a concentration of  $6 \text{ cm}^{-3}$  for the singing, and a mean respiratory rate of 15 L/min during the event with a duration of three hours. This respiratory rate is higher than of trained but lower than of untrained singers (Salomini et al., 2020). With one highly infective index case in the choir, there is a risk that 29% of the others will be infected (scenario A) (Table 4, Figure 1). This can be reduced by a more than a factor of two through active ventilation (B) and nearly a factor of nine by high-volume HEPA filtering of the air (E). We do not consider face masks and respirators for singing practice (C and D). In the event of a super spreader in the room, the infection risk is extremely high, and even with active ventilation or high-volume HEPA filtering, it is 71% (B) or 29% (E), respectively (Table 5, Figure 1).

#### 4.4. Reception

For the reception guests we assumed slightly louder speaking than in the office and classroom, leading to a particle concentration of  $1.0 \text{ cm}^{-3}$ , a speaking/breathing ratio of 0.25 and a respiration rate of 12 L/min. We obtain a lower individual infection risk than for the classroom, because the choir room is bigger and the duration of exposure is shorter. However, in the reception room many more susceptible subjects are present, which scales to the number that may be infected by one index case, being about four in the absence of mitigation measures, compared to about two in the classroom (Scenario A). The reception would become less risky with active ventilation and by wearing masks, and especially by highly efficient masks (C, D). By applying active ventilation with outside air, the individual risk is reduced by a factor of 2.5 to 3, while high-volume HEPA filtering decreases it by a factor of ten (Table 4). When the index case is a super spreader, the risk of a large number of infections is high under scenario A without mitigation (34%), which could be reduced to 14% (B) or below 9% (E), with active ventilation or high-volume HEPA filtering, respectively (Table 5). The risk that four or more guests will become infected is significant under all scenarios, except when all would wear high-efficiency masks.

#### 4.5. Cluster infections

Figure 1 illustrates that the individual infection risk from one index subject in the office, classroom and during the reception decrease in this order by factors of about two, and that during choir practice risks are relatively high. Note that the individual infection risk equals the fraction of the group that is at risk, thus being increasingly significant with the number of subjects present. If one index case impacts a large group of subjects, there is a risk that COVID-19 clusters (>10 infections) develop that need to be contained swiftly, which can be expected from superspreading events. In the present examples, the risk for the classroom refers to about 15 infection cases, 23 during choir practice and 34 at the reception. Hitherto we have assumed that the reception guests are not singing nor speaking loudly (i.e. a quiet and orderly reception without too many speeches), which is unlikely

to hold true when alcohol is consumed and musical entertainment is offered with dancing. This qualifies as a party, which appears to be relatively risky, and a cluster infection could even occur without a super spreader (Table 4, Figure 2). Many guests could become infected under scenario A (27%). Since party guests may not be interested in wearing face masks, the high-volume HEPA solution could be considered, which would reduce this number by a factor of nine, i.e. to well below the size of a cluster (about 3 cases). Such risk reduction is typical for high-volume HEPA filtering (capacity should be adapted to the room size).

## 5. Discussion

There are significant uncertainties that may influence the results of our calculations, as outlined in Section 3 where we presented the parameter constraints. Important uncertainties are related to the infective dose and the viral load, which may particularly apply to the risk estimates of children. Asymptomatic SARS-CoV-2 subjects may carry the same viral load as symptomatic ones, but the available data do not allow firm conclusions. Buonanno et al. (2020) put forward that high emission rates can be reached by asymptomatic, infectious SARS-CoV-2 subjects performing vocalization during light activities, whereas a symptomatic subject in resting conditions typically has a one to two order of magnitude lower emission rate. In schools, teachers may speak forcefully, and especially young children can be loud, which will enhance the spreading. In households, infections are higher from symptomatic than asymptomatic subjects. Since symptomatic individuals are expected to stay at home and avoid public places, the pre-symptomatic, asymptomatic and mild COVID-19 cases (the latter possibly confused with a common cold) pose the largest infection risk in indoor environments (MacIntyre and Chughtai, 2020; Riediker and Tsai, 2020).

To account for uncertainties and variability among the population, we considered a range of conditions, e.g. from small children with putatively lower viral loads up to super spreaders. Even though the estimated infection risks vary with basic assumptions, associated with uncertainty, the predicted reductions from different mitigation measures such as active ventilation with outside air, the ubiquitous wearing of face masks of intermediate and high quality, and air filtering are robust. Of course, they can be optimized, e.g. through the properties of masks and the rates of air exchange. Our sensitivity calculations for 95% efficient, high-quality masks show that much can be gained by paying attention to their properties and how they are worn. It is evident that SARS-CoV-2 can be transmitted through the air by aerosol particles, causing COVID-19 infections in the indoor environment. But uncertainties remain significant, while additional scientific research will need time to quantify infection risks and pathways in greater detail. However, by waiting for additional scientific results, valuable time will be lost that could be used to control the pandemic (Morawska and Cao, 2020).

Obviously, poor ventilation increases the time period during which aerosols accumulate in the room. Risks can be significantly reduced by regular ventilation with outside air and by the ubiquitous wearing of face masks. As a co-benefit, this will also decrease the risk of infection with influenza and common colds. Multiple studies have concluded that masks help prevent or reduce virus transmission (Leung et al., 2020; De Kai et al., 2020; Howard et al., 2020; Esposito et al., 2020; Worby and Chang, 2020; Cheng et al., 2020). Surgical masks are relatively efficient in this respect, but also home-made cloth masks can contribute, albeit with lower efficiency (Fischer et al., 2020). Drewnick et al. (2020) reported that avoiding leaks in masks is particularly important to have good overall efficacy. When masks with a sufficient number of layers of good material (especially fluffy textiles) and with proper fit are used, there could be substantial inhalation protection. The masks reduce SARS-CoV-2 emissions in both droplets and aerosol particles. At emission, the particles are initially wet (small droplets), likely remaining so under the mask. The filtration efficiency of larger droplets increases with their velocity, e.g. during coughing and sneezing (Drewnick et al., 2020). Since the face velocity and the particle size from speaking may be larger than from breathing, enhanced filtration efficiency is expected.

From SARS-CoV-2 measurements in hospitals it follows that room ventilation, open space and sanitization can effectively limit aerosol concentrations (Liu et al., 2020). Nevertheless, when there is a highly infectious subject in the room, especially for a prolonged period, strict respiratory protection measures are needed. In such environments, loose-fitting masks will not prevent infection, and one should consider respirators that are designed to protect the wearer, e.g. those with FFP2 and FFP3 quality. Further, high-volume air filtration systems (with HEPA filters) can help remove aerosol particles from the indoor environment. The overall efficiency is determined by the volume that can be purified per hour. This is mostly a flow-technical question and should involve characterization of air turbulence, mixing and ventilation. It was estimated that an air filtering system with a capacity up to 1,500 m<sup>3</sup>/hour can effectively reduce the aerosol concentration throughout a room of 80 m<sup>2</sup> in a short period of time, although this calculation did not account for continuous emissions of particles (Kähler et al., 2020).

## 6. Conclusions

Based on data from RT-PCR tests in Switzerland and Germany (Jacot et al., 2020; Jones et al., 2020), encompassing around 8,000 subjects who were confirmed as SARS-CoV-2 infected, it was found that in the most infectious phase, probably around the onset of symptoms, patients carry a mean viral load around  $5 \times 10^8$  viral (RNA) copies mL<sup>-1</sup>. This occurred in about one fifth of the positive tests, and we define this category as “*highly infectious*”. A few percent of the positive RT-PCR tests indicated an order of magnitude higher viral load, i.e. around  $5 \times 10^9$  mL<sup>-1</sup>, which we categorize as

“*super infectious*”. Further, the super infectious category additionally includes a group of highly infectious subjects who are super aerosol-emitters, who produce an order of magnitude more particles during breathing and vocalization, although we do not have information on their frequency of occurrence. The presence of such index subjects in the room (super spreaders) is associated with a very high infection risk from aerosol transmission. Nevertheless, we find that both categories can significantly contribute to COVID-19 risk through aerosols. It is possible that school children, especially under ten years of age, are less frequently infective. However, since school class environments are much more common than the others considered here, the overall incidence of infection outbreaks may nevertheless be high.

Super spreading events from a single index subject can cause COVID-19 clusters (>10 infections), also in classrooms. The risk of clusters from super spreaders is particularly high during choir practice (e.g. most singers infected) and on receptions (e.g. a third of the guests infected). Even with an index subject who is highly infectious (i.e. ten times less infectious than a super spreader), during party events the risk of a COVID-19 cluster is significant (e.g. 25–30 of 100 guests infected). Generally, the risk of clusters may be curbed by high-volume HEPA filtering. But since these techniques are in limited supply and costly, active ventilation and the wearing of face masks may be preferred options, as they achieve similar results at greatly reduced cost. The best, low-cost solution is the ubiquitous wearing of high-quality masks, which is estimated to be about five times more effective. But it seems unpalatable that such measures will be adopted by choir singers and party guests.

We reiterate that we merely present examples, and deviations for individual environments and conditions are imminent. To assess the risk reduction from the wearing of face masks, we adopted two levels of filtering efficiency, but did not consider the large range of available types. Clearly, improved quality masks, optimal fitting and hygienic discipline will greatly improve efficiency. Notwithstanding the uncertainties, we are confident that the relative reductions predicted for different mitigation measures such as active ventilation with outside air, the ubiquitous wearing of face masks of intermediate and high quality, and air filtering are robust. The Supplement offers our algorithm, which can be adapted to other environments and scenarios, under the premise that the room size is not too large (>100 m<sup>2</sup>), for which our rapid air mixing assumption would be violated. We endorse the reasoning of De Kai et al. (2020), who conclude that a “mouth-and-nose lockdown is far more sustainable than a full lockdown, from economic, social, and mental health standpoints”.

**Table 1.** Spreadsheet parameters and ranges applied to compute infection risk. Standard setting refers to a classroom (indoor environment nr. 2).

| <b>Parameters</b>                                           | <b>Standard</b>   | <b>Range</b>                       | <b>Units</b>               |
|-------------------------------------------------------------|-------------------|------------------------------------|----------------------------|
| Infectious episode (exposure)                               | 2                 | 0.08 – 5                           | days                       |
| Wet aerosol diameter                                        | 5                 | 2 – 10                             | µm                         |
| Virus lifetime in aerosol                                   | 1.7               | 0.6 – 2.6                          | hours                      |
| Emission during breathing                                   | 0.1               | 0.06 – 1.0                         | cm <sup>-3</sup>           |
| Emission during speaking (singing)                          | 1.1               | 0.06 – 3.0                         | cm <sup>-3</sup>           |
| Speaking/breathing ratio                                    | 0.10              | 0 – 1                              | -                          |
| Respiratory rate                                            | 10                | 5 – 20                             | L/min                      |
| Viral load “highly infectious”                              | 5×10 <sup>8</sup> | 10 <sup>8</sup> – 10 <sup>9</sup>  | RNA copies/cm <sup>3</sup> |
| Viral load “super infectious”                               | 5×10 <sup>9</sup> | 10 <sup>9</sup> – 10 <sup>10</sup> | RNA copies/cm <sup>3</sup> |
| Deposition probability in lungs                             | 0.5               | 0.2 – 0.8                          | -                          |
| Infective dose (D50)                                        | 316               | 100 – 1000                         | RNA copies                 |
| Room area                                                   | 60                | 40 – 100                           | m <sup>2</sup>             |
| Room height                                                 | 3                 | 3 – 4                              | m                          |
| Subjects in room                                            | 25                | 4 – 100                            | persons                    |
| Passive ventilation rate                                    | 0.35              | 0 – 1                              | hour <sup>-1</sup>         |
| Active ventilation rate (with outside air)                  | 2                 | 2 – 9                              | hour <sup>-1</sup>         |
| Face mask filter efficiency from inhalation plus exhalation | 0.7               | 0 – 0.95                           | -                          |

**Table 2.** Example indoor environments. There is one index subject present for the indicated time period.

| Indoor environment | Room size (m <sup>2</sup> ) | Room height (m) | Subjects present | Exposure duration (hours) |
|--------------------|-----------------------------|-----------------|------------------|---------------------------|
| 1. Office          | 40                          | 3               | 4                | 16                        |
| 2. Classroom       | 60                          | 3               | 25               | 12                        |
| 3. Choir practice  | 100                         | 4               | 25               | 3                         |
| 4. Reception       | 100                         | 4               | 100              | 3                         |

**Table 3.** Scenarios of mitigation measures. VR is ventilation rate with outside air, or by high-volume HEPA filtering (last column).

| Scenario                                | VR 0.35 hr <sup>-1</sup> | VR 2 hr <sup>-1</sup> | Masks, 70% efficiency | Masks, 95% efficiency | High-vol VR 9 hr <sup>-1</sup> |
|-----------------------------------------|--------------------------|-----------------------|-----------------------|-----------------------|--------------------------------|
| A. Standard (passive ventilation)       | √                        |                       |                       |                       |                                |
| B. Active ventilation                   |                          | √                     |                       |                       |                                |
| C. Active ventilation plus facial masks |                          | √                     | √                     |                       |                                |
| D. Active ventilation plus FFP2 masks   |                          | √                     |                       | √                     |                                |
| E. High volume air filtration with HEPA |                          |                       |                       |                       | √                              |



**Table 4.** COVID-19 infection risk in four example environments for five scenarios. Unit: percent per episode. The individual risk is that of a particular person being infected, the group risk refers to the infection risk of at least one person in the group.

| <b>Environment</b>                                | <b>Scenario A</b><br>VR 0.35 hr <sup>-1</sup> | <b>Scenario B</b><br>VR 2 hr <sup>-1</sup> | <b>Scenario C</b><br>Masks, 70%<br>efficiency | <b>Scenario D</b><br>Masks, 95%<br>efficiency | <b>Scenario E</b><br>High-vol<br>VR 9 hr <sup>-1</sup> |
|---------------------------------------------------|-----------------------------------------------|--------------------------------------------|-----------------------------------------------|-----------------------------------------------|--------------------------------------------------------|
| <b>1.1.</b> Office<br>Individual risk             | 18                                            | 7.0                                        | 2.2                                           | 0.4                                           | 1.9                                                    |
| <b>1.2.</b> Office.<br>Group risk                 | 45                                            | 20                                         | 6.3                                           | 1.1                                           | 5.7                                                    |
| <b>2.1.</b> Classroom<br>Individual risk (>10 yr) | 9.5                                           | 3.6                                        | 1.1                                           | 0.2                                           | 1.0                                                    |
| <b>2.2.</b> Classroom<br>Group risk (>10 yr)      | 91                                            | 58                                         | 23                                            | 4.3                                           | 21                                                     |
| <b>2.3.</b> Classroom<br>Individual risk (≤10 yr) | 1.0                                           | 0.4                                        | 0.1                                           | 0                                             | 0.1                                                    |
| <b>2.4.</b> Classroom<br>Group risk (≤10 yr)      | 21                                            | 8.3                                        | 2.6                                           | 0.4                                           | 2.3                                                    |
| <b>3.1.</b> Choir practice<br>Individual risk     | 29                                            | 12                                         | -                                             | -                                             | 3.3                                                    |
| <b>3.2.</b> Choir practice<br>Group risk          | 100                                           | 95                                         | -                                             | -                                             | 55                                                     |
| <b>4.1.</b> Reception<br>Individual risk          | 4.1                                           | 1.5                                        | 0.5                                           | 0.1                                           | 0.4                                                    |
| <b>4.2.</b> Reception<br>Group risk               | 98                                            | 78                                         | 36                                            | 7.2                                           | 33                                                     |
| <b>4.3</b> Party<br>Individual risk               | 27                                            | 11                                         | 3.4                                           | 0.6                                           | 3.0                                                    |
| <b>4.4.</b> Party<br>Group risk                   | 100                                           | 100                                        | 97                                            | 43                                            | 95                                                     |

**Table 5.** COVID-19 infection risk in four example environments for five scenarios. The index subject is assumed to be either super infectious (10× higher viral load) or a super emitter (10× higher aerosol emission rate). Unit: percent per episode. The individual risk is that of a particular person being infected, the group risk refers to the infection risk of at least one person in the group.

| <b>Environment</b>                                | <b>Scenario A</b><br>VR 0.35 hr <sup>-1</sup> | <b>Scenario B</b><br>VR 2 hr <sup>-1</sup> | <b>Scenario C</b><br>Masks, 70%<br>efficiency | <b>Scenario D</b><br>Masks, 95%<br>efficiency | <b>Scenario E</b><br>High-vol<br>VR 9 hr <sup>-1</sup> |
|---------------------------------------------------|-----------------------------------------------|--------------------------------------------|-----------------------------------------------|-----------------------------------------------|--------------------------------------------------------|
| <b>1.1. Office</b><br>Individual risk             | 87                                            | 52                                         | 20                                            | 3.6                                           | 18                                                     |
| <b>1.2. Office</b><br>Group risk                  | 100                                           | 89                                         | 48                                            | 10                                            | 44                                                     |
| <b>2.1. Classroom</b><br>Individual risk (>10 yr) | 63                                            | 30                                         | 10                                            | 1.8                                           | 9.3                                                    |
| <b>2.2. Classroom</b><br>Group risk (>10 yr)      | 100                                           | 100                                        | 93                                            | 35.3                                          | 90                                                     |
| <b>3.1. Choir practice</b><br>Individual risk     | 97                                            | 71                                         | -                                             | -                                             | 29                                                     |
| <b>3.2. Choir practice</b><br>Group risk          | 100                                           | 100                                        | -                                             | -                                             | 100                                                    |
| <b>4.1. Reception</b><br>Individual risk          | 34                                            | 14                                         | 4.5                                           | 0.8                                           | 4.0                                                    |
| <b>4.2. Reception</b><br>Group risk               | 100                                           | 100                                        | 99                                            | 53                                            | 98                                                     |

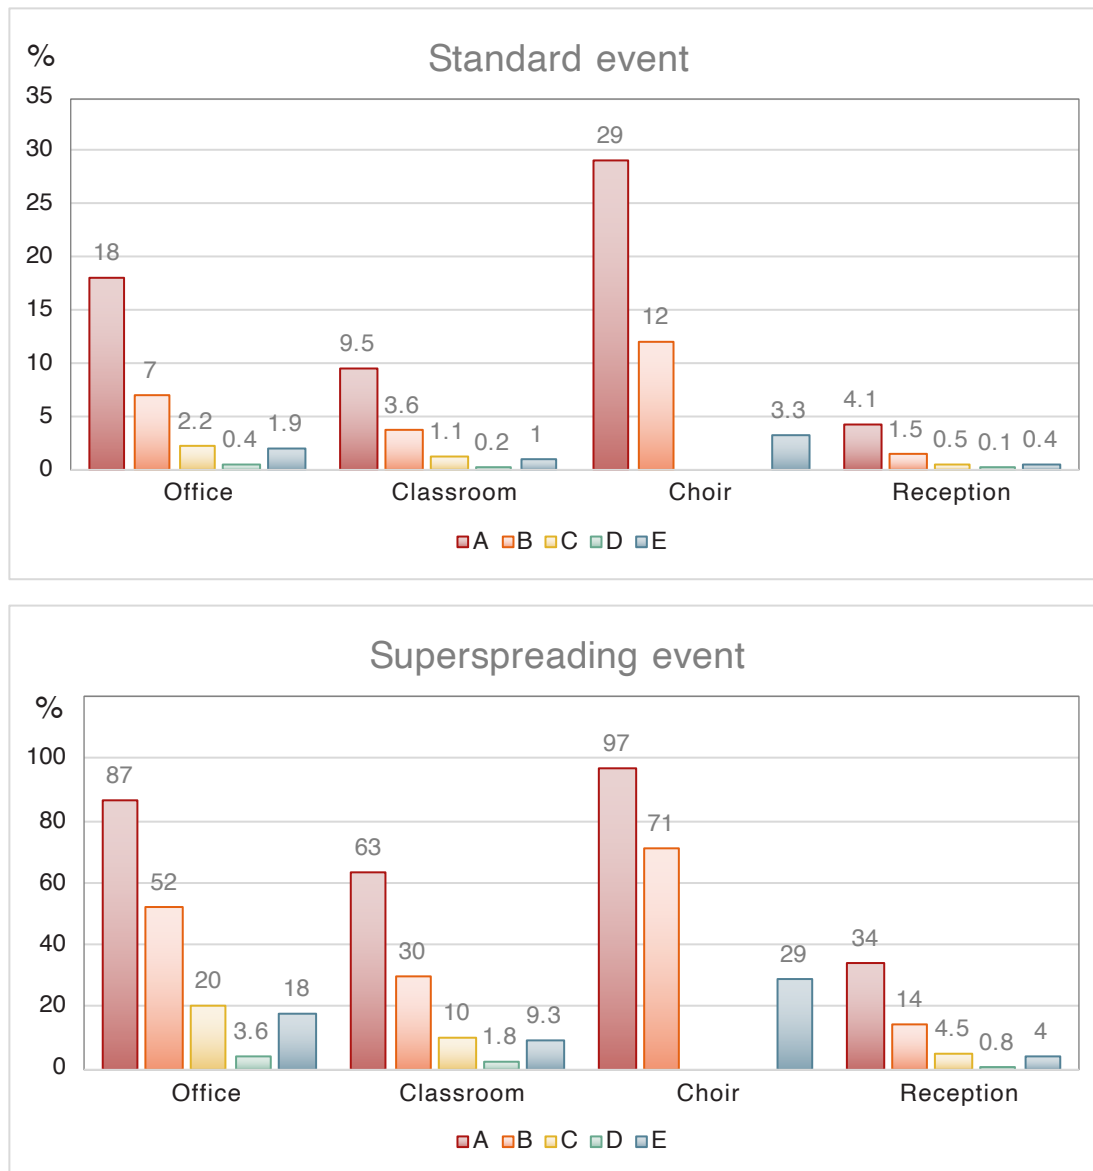

**Figure 1.** Individual risk of a particular person being infected (equivalent to the fraction of the group being infected) in four indoor environments and five scenarios, for standard and superspreading conditions. Scenario A: passive ventilation, no masks. Scenario B: active ventilation with outside air, no masks. Scenario C: active ventilation, facial masks (not for choir). Scenario D: active ventilation, high-quality masks (not for choir). Scenario E: High-volume filtration with HEPA.

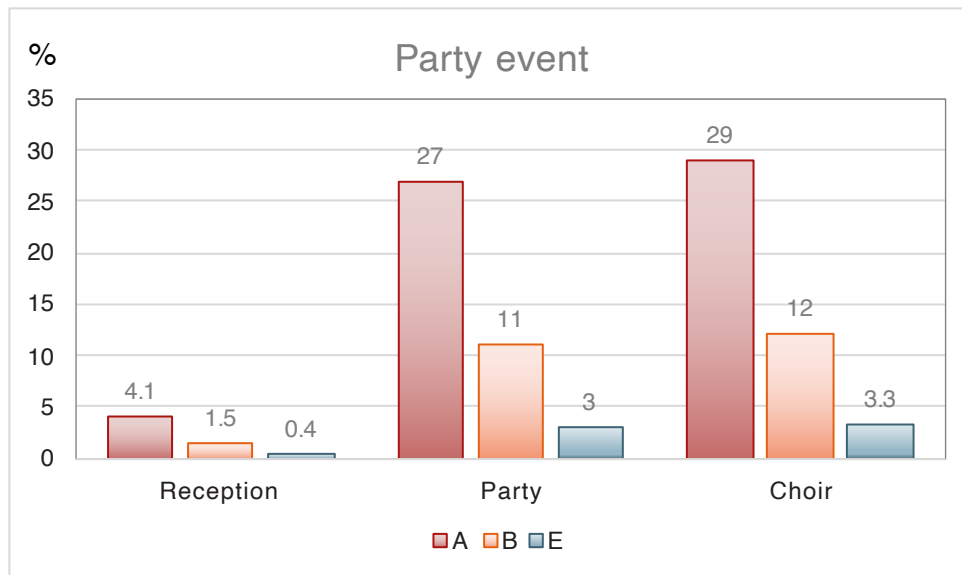

**Figure 2.** Individual risk of a particular person being infected (equivalent to the fraction of the group being infected), comparing a party with a reception and a choir practice, for three scenarios. Scenario A: passive ventilation, no masks. Scenario B: active ventilation with outside air, no masks. Scenario E: High-volume filtration with HEPA.

## References

- Arons M M, Hatfield K M, Reddy S C, Kimball A, James A, Jacobs J R, Taylor J, Spicer K, Bardossy A C, Oakley L P, Tanwar S, Dyal J W, Harney J, Chisty Z, Bell J M, Methner M, Paul P, Carlson C M, McLaughlin H P, Thornburg N, Tong S, Tamin A, Tao Y, Uehara A, Harcourt J, Clark S, Brostrom-Smith C, Page L C, Kay M, Lewis J, Montgomery P, Stone N D, Clark T A, Honein M A, Duchin J S, Jernigan J A for the Public Health–Seattle and King County and CDC COVID-19 Investigation Team 2020 Presymptomatic SARS-CoV-2 Infections and Transmission in a Skilled Nursing Facility *N. Engl. J. Med.* **382** 2081-90
- Asadi S, Wexler A S, Cappa C D, Santiago Barreda S, Bouvier N M, Ristenpart W D 2019 Aerosol emission and superemission during human speech increase with voice loudness *Sci. Rep.* **9** 2348
- Asadi S, Wexler A S, Cappa C D, Barreda S, Bouvier NM, Ristenpart WD 2020 Aerosol emission and superemission during human speech increase with voice loudness *Sci. Rep.* **9** 2348
- Asgharian B, Hofmann W and Bergmann R 2001 Particle deposition in a multiple-path model of the human lung *Aerosol Sci. Technol.* **34** 332-339
- Auger K A, Shah S S, Richardson T, Hartley D, Hall M, Warniment A, Timmons K, Bosse D, Ferris S A, Brady, P W, Schondelmeyer A C and Thomson J E 2020 Association between statewide school closure and COVID-19 incidence and mortality in the US *JAMA* **324** 859-870
- Borak J 2020 Airborne transmission of COVID-19 *Occup. Med.* **70** 297–299
- Buitrago-Garcia D, Egli-Gany D, Counotte M J, Hossmann S, Imeri H, Ipekci M A, Salanti G and Low N 2020 Asymptomatic SARS-CoV-2 infections: a living systematic review and 1 meta-analysis *medRxiv*. <https://doi.org/10.1101/2020.04.25.20079103>
- Buonanno G, Stabile L and Morawska L 2020 Estimation of airborne viral emission: Quanta emission rate of SARS-CoV-2 for infection risk assessment *Environ. Int.* **141** 105794
- Cai J, Sun W, Huang J, Gamber M, W J and He G 2020 Indirect Virus Transmission in Cluster of COVID-19 Cases, Wenzhou, China, 2020 *Emerg. Infect. Dis.* **26** 1343
- Casanova, L M, Jeon, S, Rutala W A, Weber D J and Sobsey M D 2010 Effects of air temperature and relative humidity on coronavirus survival on surfaces *Appl. Environ. Microbiol.* **76** 2712–2717
- Cheng Y, Ma N, Witt C, Rapp S, Wild P, Andreae M O, Pöschl U and Su H 2020 Distinct regimes of particle and virus abundance explain face mask efficacy for COVID-19 *medRxiv* <https://doi.org/10.1101/2020.09.10.20190348>
- Chu D K, Akl, E A, Duda S, Solo K, Yaacoub S, Schünemann H J 2020 Physical distancing, face masks, and eye protection to prevent person-to-person transmission of SARS-CoV-2 and COVID-19: a systematic review and meta-analysis *Lancet* **395** 1973–87
- Davies A, Thompson K-A, Giri K, Kafatos G, Walker J and Bennett A 2013 Testing the efficacy of homemade masks: Would they protect in an influenza pandemic? *Disaster Med. Public Health Prep.* **7** 413-418
- Davies N G, Klepac P, Liu Y, Prem K, Jit M, CMMID COVID-19 working group, Eggo RM 2020 Age-dependent effects in the transmission and control of COVID-19 epidemics *Nat Medicine* **26** 1205-1211
- de Gaborya L, Alharbia A, Kérimiana M and Lafonc M-E 2020 The influenza virus, SARS-CoV-2, and the airways: Clarification for the otorhinolaryngologist *Eur. Ann. Otorhinolaryngol. Head Neck Dis.* **137** 291–296

- De Kai D, Goldstein G-P, Morgunov A, Nangalia V and Rotkirch A 2020 Universal Masking is Urgent in the COVID-19 Pandemic: SEIR and Agent Based Models, Empirical Validation, Policy Recommendations arXiv:2004.13553 [physics.soc-ph]
- Dong J, Shang Y, Tian L, Inthavong K, Qiu D and Tu J 2019 Ultrafine particle deposition in a realistic human airway at multiple inhalation scenarios *Int. J Numer. Meth. Biomed. Engng.* **35** 3215
- Drewnick F, Pikmann J, Fachinger F, Moormann L, Sprang F and Borrmann S 2020 Aerosol filtration efficiency of household materials for homemade face masks: influence of material properties, particle size, particle electrical charge, face velocity, and leaks *Aerosol Sci. Technol.* DOI: 10.1080/02786826.2020.1817846
- Esposito S, Principi N, Leung C C and Migliori G B 2020 Universal use of face masks for success against COVID-19: evidence and implications for prevention policies *Eur. Respir. J.* **55** 2001260
- Fernandez M O, Thomas R J, Garton N J, Hudson A, Haddrell A, Reid J R 2019 Assessing the airborne survival of bacteria in populations of 10 aerosol droplets with a novel technology. *J. Roy. Soc. Int.* **16**, 20180779.
- Fischer E P, Fischer M C, Grass D, Henrion I, Warren W S and Westman E 2020 Low-cost measurement of facemask efficacy for filtering expelled droplets during speech *Sci. Adv.* **6** eabd3083
- Gregson, F K A, Watson N A, Orton C M, Haddrell A E, McCarthy L P, Finnie T J R, Gent N, Donaldson G C, Shah P L, Calder J D, Bzdek B R, Costello D and Reid J P 2020 Comparing the Respirable Aerosol Concentrations and 1 Particle Size Distributions Generated by Singing, 2 Speaking and Breathing *ChemRxiv*. doi.org/10.26434/chemrxiv.12789221.v1
- Hamner L, Dubbel P, Capron I, Ross A, Jordan A, Lee J, Lynn J, Ball A, Narwal S, Russell S, Patrick D and Leibrand H 2020 High SARS-CoV-2 Attack Rate Following Exposure at a Choir Practice — Skagit County, Washington, March 2020 *MMWR* **69** 606-610
- Heyder J 2004 Deposition of inhaled particles in the human respiratory tract and onsequences for regional targeting in respiratory drug delivery *Proc. Am. Thorac. Soc.* **1** 315-320
- He X, Lau E H Y, Wu P, Deng X, Wang J, Hao X, Lau Y C, Wong J Y, Guan Y, Tan X, Mo X, Chen Y, Liao B, Chen W, Hu F, Zhang Q, Zhong M, Wu Y, Zhao L, Zhang F, Cowling B J, Li, F and Leung G M 2020 Temporal dynamics in viral shedding and transmissibility of COVID-19 *Nat. Med.* **26** 672–675
- Howard J, Huang A, Li Z, Tufekci Z, Zdimal V, van der Westhuizen H, von Delft A, Price A, Fridman L, Tang L, Tang V, Watson G L, Bax C E, Shaikh R, Questier F, Hernandez D, Chu L F, Ramirez C M and Rimoin A W 2020 Face Masks Against COVID-19: An Evidence Review *Preprints 2020*, 2020040203 (doi: 10.20944/preprints202004.0203.v1)
- Howard-Reed C, Wallace L A and Ott W R 2011 The effect of opening windows on air change rates in two homes *J. Air Waste Manag. Assoc.*, **52** 147-159
- Hsiao T-C, Chuang H-C, Griffith S M, Chen S-J, Young LH COVID-19: An aerosol’s point of view from expiration to transmission to viral-mechanism 2020 *Aerosol Air Quality Res.*, **20** 905-910
- Inthavong K, Ge Q J, Li X D and Tu J T 2012 Detailed predictions of particle aspiration affected by respiratory inhalation and airflow *Atmos. Environ.* **62** 107-117
- Jacot D, Greub G, Jatton K and Opota O 2020 Viral load of SARS-1 CoV-2 across patients and compared to other respiratory viruses *Microbes and Infection*, <https://doi.org/10.1016/j.micinf.2020.08.004>

- Jayaweera M, Perera H, Gunawardana B and Manatunge J 2020 Transmission of COVID-19 virus by droplets and aerosols: A critical review on the unresolved dichotomy *Environ. Res.* **188**109819
- Johnson G.R, Morawska L, Ristovski Z D, Hargreaves M, Mengersen K, Chao C Y H, Wan M P, Li Y, Xie X, Katoshevski D and Corbett S 2011 Modality of human expired aerosol size distributions *J. Aerosol Sci.* **42** 839–851
- Jones T C, Mühlemann B, Veith T, Zuchowski M, Hofmann J, Stein A, Edelmann A, Corman V M and Christian Drosten C An analysis of SARS-CoV-2 viral load by patient age *medRxiv*. <https://doi.org/10.1101/2020.06.08.20125484>
- Kähler C J, Fuchs T and Hain R 2020 Können mobile Raumlufreiniger eine indirekte SARS-CoV-2 Infektionsgefahr durch Aerosole wirksam reduzieren? Universität der Bundeswehr München, Institut für Strömungsmechanik und Aerodynamik, Version vom 05.08.2020
- Karimzadeh S, Bhopal R and Huy N T 2020 Review of viral dynamics, exposure, infective dose, and outcome of COVID-19 caused by the SARS-COV2 virus: comparison with other respiratory viruses *Preprints* 2020, 2020070613
- Klompas, Baker, M A and Rhee C 2020 Airborne Transmission of SARS-CoV-2 Theoretical Considerations and Available Evidence *JAMA* **324** 441-442
- Lauer S A, Grantz K H, Bin Q, Jones F K, Zheng Q, Meredith H R, Azman A S, Reich N G and Lessler J 2020 The Incubation Period of Coronavirus Disease 2019 (COVID-19) From publicly reported confirmed cases: Estimation and application *Ann. Intern. Med.* **172** 577-582
- Leung N H L, Chu D K W, Shiu E Y C, Chan K-H, McDevitt J J, Hau B J P, Yen H-L, Li Y, Ip D K M, Peiris J S M, Seto W-H, Leung G M, Milton D K and Cowling B J 2020 Respiratory virus shedding in exhaled breath and efficacy of face masks *Nature Medicine* **26** 676–680
- Liu L, Wei J, Li Y and Ooi A 2017 Evaporation and dispersion of respiratory droplets from coughing *Indoor Air* **27** 179–190
- Lloyd-Smith J O, Schreiber S J, Kopp P E and Getz W M 2005 Superspreading and the effect of individual variation on disease emergence *Nature* **438** 355–359
- Lukassen S, Chua R L, Timo Trefzer T, Kahn N C, Schneider M A, Muley T, Winter H, Meister M, Veith C, Boots A W, Hennig B P, Kreuter M, Conrad C and Eils R 2020 SARS-CoV-2 receptor ACE2 and TMPRSS2 are primarily expressed in bronchial transient secretory cells *EMBO J.* **39**:e105114
- MacIntyre C R and Chughtai A A 2020 A rapid systematic review of the efficacy of face masks and respirators against coronaviruses and other respiratory transmissible viruses for the community, healthcare workers and sick patients *Int. J. Nurs Stud.* **108** 103629
- Mizumoto K, Omori R, Nishiura H 2020 Age specificity of cases and attack rate of novel coronavirus disease (COVID-19) *medRxiv*. <https://doi.org/10.1101/2020.03.09.20033142>
- Montoya L D, Lawrence J, Krishna Murthy G G, Sarnat J A, Godleski J J, Koutrakis P 2004 Continuous measurements of ambient particle deposition in human subjects *Aerosol Sci. Technol.* **38**, 980-990
- Morawska L and Cao J 2020 Airborne transmission of SARS-CoV-2: The world should face the reality *Environ. Int.* **139** 105730
- Morawska L and Milton D K 2020 It is time to address airborne transmission of COVID-19 *Clin. Infect. Dis.* [ciaa939](https://doi.org/10.1093/cid/ciaa939), doi: 10.1093/cid/ciaa939

- Morawska L, Johnson G R, Ristovski Z D, Hargreaves M, Mengersen K, Corbett S, Chao C Y H, Li Y and Katoshevski D 2009 Size distribution and sites of origin of droplets expelled from the human respiratory tract during expiratory activities *J. Aerosol Sci.* **40** 256-269
- Morawska L, Tang J W, Bahnfleth W, Bluysen P M, Boerstra A, Buonanno G, Caog J, Dancer S, Floto A, Franchimon F, Haworth C, Hogeling J, Isaxon C, Jimenez J L, Kurnitski J, Li Y, Loomans M, Marks G, Marr L C, Mazzeo L, Melikov A K, Miller S, Milton D K, Nazaroff W, Nielsen P V, Noakes C, Peccia J, Querola X, Sekhara C, Seppänen O, Tanabe S-I, Tellier R, Tham K W, Wargo P, Wierzbicka A and Yao M 2020 How can airborne transmission of COVID-19 indoors be minimised? *Environ. Int.* **142** 105832
- Mürbe D, Fleischer M, Lange J, Rotheudt H and Kriegel M 2020 Aerosol emission is increased in professional singing [10.14279/depositonce-10374](https://doi.org/10.14279/depositonce-10374)
- Mueller A V, Eden M J, Oakes J M, Bellini C and Fernandez L A 2020 Quantitative method for comparative assessment of particle filtration efficiency of fabric masks as alternatives to standard surgical masks for PPE *medRxiv*. <https://doi.org/10.1101/2020.04.17.20069567>
- Nishiura, H, Oshitani H, Kobayashi T, Saito T Sunagawa, T, Matsui T, Wakita T, HLW COVID-19 Response Team and Suzuki M 2020 Closed environments facilitate secondary transmission of coronavirus disease 2019 (COVID-19) *medRxiv*. <https://doi.org/10.1101/2020.02.28.20029272>
- Pan Y, Zhang D, Yang P, Poon L L M and Wang Q 2020 Viral load of SARS-CoV-2 in clinical samples *Lancet Infect. Dis.* **20** 411-412
- Pujadas, E, Chaudhry F, McBride, R, Richter F, Zhao S, Wajnberg A, Nadkarni G, Glicksberg B S, Houldsworth J and Cordon-Cardo C 2020 SARS-CoV-2 viral load predicts COVID-19 mortality *Lancet Respir. Med.* **8** [https://doi.org/10.1016/S2653-4324\(20\)30034-4](https://doi.org/10.1016/S2653-4324(20)30034-4)
- Pyankov O V, Bodnev S A, Pyankova O and Agranovski I E 2018 Survival of aerosolized coronavirus in the ambient air *Aerosol Sci. Technol.* **115** 158-163
- Riediker M and Tsai D-H 2020 Estimation of Viral Aerosol Emissions From Simulated Individuals With Asymptomatic to Moderate Coronavirus Disease 2019 *JAMA Network Open* **3**:e2013807
- Salomoni S, van den Hoorn W, Hodges P 2020 Breathing and Singing: Objective characterization of breathing patterns in classical singers *PLOS One* **11** e0155084
- Shakya K M, Noyes A, Kallin R and Peltie R E 2017 Evaluating the efficacy of cloth facemasks in reducing particulate matter exposure *J. Expo. Sci.* **27** 352–357
- Stahlhofen, W, Rudolf, G and James A C 1989 Intercomparison of experimental regional aerosol deposition data *J. Aerosol Med.* **2** 285-308
- To K K-W, Tsang O T-Y, Leung W-S, Tam A R, Wu T-C, Lung D C, Yip C C-Y, Cai, J-P, Chan J M-C, Chik T S-H, Lau D P-L, Choi C Y-C, Chen L-L, Chan W-M, Chan K-H, Ip J D, Ng A C-K, Poon R W-S, Luo C-T, Cheng V C-C, Chan J F-W, Hung I F-N, Chen Z, Chen H and Yuen K-Y 2020 Temporal profiles of viral load in posterior oropharyngeal saliva samples and serum antibody responses during infection by SARS-CoV-2: an observational cohort study *Lancet Infect. Dis.* **20** 565-574
- Tsuda A, Henry F S, Butler J P 2015 Particle transport and deposition: basic physics of particle kinetics *Compr. Physiol.* **3** 1437-1471
- van Doremalen N, Bushmaker T, Morris D H, Holbrook M G, Gamble A, Williamson B N, Tamin A, Harcourt J L, Thornburg N J, Gerber S I, Lloyd-Smith J O, de Wit E and Munster V 2020 Aerosol



- and surface stability of SARS-CoV-2 as compared with SARS-CoV-1 *N. Engl. J. Med.* **382** 1564-1567
- Verma S, Dhanak M and Frankenfield J 2020 Visualizing the effectiveness of face masks in obstructing respiratory jets *Phys. Fluids* **32** 061708
- Viner R M, Russell S J, Croker H, Packer J, Ward J, Stansfield C, Mytton O, Bonell C and Booy R 2020 School closure and management practices during coronavirus outbreaks including COVID-19: a rapid systematic review *Lancet Child Adolesc. Health.* **4** 397-404
- Vuorinen V, Aarnio M, Alava M, Alopaeus V, Atanasova N, Auvinen M, Balasubramanian N, Bordbar H, Erasto P, Grande R, Hayward N, Hellsten A, Hostikka S, Hokkanen J, Kaario O, Karvinen A, Kivisto I, Korhonen M, Kosonen R, Kuusela J, Lestinen S, Laurila E, Nieminen H J, Peltonen P, Pokki J, Puisto A, Raback P, Salmenjoki H, Sironen T and Osterberg M 2020 Modelling aerosol transport and virus exposure with numerical simulations in relation to SARS-CoV-2 transmission by inhalation indoors *Saf. Sci.* **130** 104866
- Wang B, Wu H and Wan X-F 2020 Transport and fate of human expiratory droplets—A modeling approach *Phys. Fluids* **32** 083307
- Watanabe T, Bartrand T A, Weir M H, Omura T and Haas C N 2010 Development of a dose-response model for SARS Coronavirus *Risk Analysis* **30** 1129-1138
- Wölfel R, Corman V M, Guggemos W, Seilmaier M, Zange S, Müller M A, Niemeyer D, Jones T C, Vollmar P, Rothe C, Hoelscher M, Bleicker T, Brunink S, Schneider J, Ehmann R, Zwirgmaier K, Drosten C and Wendtner C 2020 Virological assessment of hospitalized patients with COVID-2019 *Nature* **581** 465-469
- Worby C J and Chang H-H Face mask use in the general population and optimal resource allocation during the COVID-19 pandemic 2020 *Nat. Commun.* **11** 4049
- Yan J, Grantham M, Pantelic J, de Mesquita P J B, Albert B, Liu F, Ehrman S, Milton D K and EMIT Consortium 2018 Infectious virus in exhaled breath of symptomatic seasonal influenza cases from a college community *PNAS* **115** 1081–1086
- Yu X, Sun S, Shi Y, Wang H, Zhao R and Sheng J 2020 SARS-CoV-2 viral load in sputum correlates with risk of COVID-19 progression *Crit. Care* **24** 170
- Zhang R, Li Y, Zhang A L, Wang Y and Molina M J 2020 Identifying airborne transmission as the dominant route for the spread of COVID-19 *PNAS* **117** 14857-14863
